# Supplementary material
Source: PubMed Central journal article supplement (PMC3402707)

**Table 1 (online only). Demographics of Cases by Site**

|                                                       | <b>Site 1<br/>N=13</b> | <b>Site 2<br/>N=68</b> | <b>Site 3<br/>N=33</b> | <b>Site 4<br/>N=65</b> | <b>Site 5<br/>N=15</b> | <b>Site 6<br/>N=21</b> | <b>Site 7<br/>N=6</b> | <b>Site 8<br/>N=40</b> | <b>All<br/>N=261</b> |
|-------------------------------------------------------|------------------------|------------------------|------------------------|------------------------|------------------------|------------------------|-----------------------|------------------------|----------------------|
| Age, years<br>(median, IQR)                           | 3.7<br>(1.5-9.2)       | 10.3<br>(4.2-12.7)     | 6.5<br>(2.8-9.8)       | 6.7<br>(3.7-11.4)      | 4.0<br>(2.2-11.6)      | 8.3<br>(3.6-13.0)      | 7.7<br>(1.8-11.3)     | 5.0<br>(1.9-10.8)      | 6.8<br>(2.5-11.8)    |
| BMI <sup>a</sup> , kg/m <sup>2</sup><br>(median, IQR) | 18.9<br>(16.3-32.5)    | 19.8<br>(15.0-21.9)    | 15.9<br>(13.4-18.4)    | 17.6<br>(14.9-24.7)    | 16.3<br>(13.4-18.0)    | 17.3<br>(16.4-18.1)    | 18.6<br>(16.8-19.1)   | 18.6<br>(15.9-23.5)    | 18.1<br>(15.1-22.7)  |
| Sex, male (n, %)                                      | 7 (54)                 | 48 (71)                | 25 (76)                | 37 (57)                | 8 (53)                 | 12 (57)                | 5 (83)                | 19 (48)                | 161 (62)             |
| Race (n, %) *                                         |                        |                        |                        |                        |                        |                        |                       |                        |                      |
| Black                                                 | 4 (57)                 | 57 (86)                | 12 (50)                | 43 (72)                | 2 (15)                 | 7 (35)                 | 2 (50)                | 14 (40)                | 141 (62)             |
| White                                                 | 2 (29)                 | 9 (14)                 | 11 (46)                | 14 (23)                | 9 (69)                 | 9 (45)                 | 1 (25)                | 21 (60)                | 76 (33)              |
| Asian                                                 | 1 (14)                 | 0                      | 1 (4)                  | 3 (5)                  | 1 (8)                  | 1 (5)                  | 1 (25)                | 0                      | 8 (3)                |
| Other                                                 | 0                      | 0                      | 0                      | 0                      | 1 (8)                  | 3 (15)                 | 0                     | 0                      | 4 (2)                |
| Ethnicity (n, %)                                      |                        |                        |                        |                        |                        |                        |                       |                        |                      |
| Hispanic                                              | 6 (46)                 | 0                      | 1 (3)                  | 8 (12)                 | 1 (7)                  | 4 (19)                 | 0                     | 0                      | 20 (8)               |
| Non-Hispanic                                          | 7 (54)                 | 66 (97)                | 22 (67)                | 51 (78)                | 13 (87)                | 17 (81)                | 4 (67)                | 4 (10)                 | 184 (70)             |
| Unknown                                               | 0                      | 2 (3)                  | 10 (30)                | 6 (9)                  | 1 (7)                  | 0                      | 2 (33)                | 36 (90)                | 57(22)               |
| Insurance (n, %) *                                    |                        |                        |                        |                        |                        |                        |                       |                        |                      |
| Commercial                                            | 1 (8)                  | 17 (25)                | 17 (52)                | 29 (46)                | 6 (43)                 | 14 (67)                | 4 (67)                | 17 (45)                | 105 (41)             |
| Medicaid                                              | 12 (92)                | 51 (75)                | 14 (42)                | 31 (49)                | 5 (36)                 | 5 (24)                 | 1 (17)                | 19 (50)                | 138 (54)             |
| Other                                                 | 0                      | 0                      | 2 (6)                  | 3 (5)                  | 3 (21)                 | 2 (10)                 | 1 (17)                | 2 (5)                  | 13 (5)               |

<sup>a</sup>BMI is body mass index.

\* Data points missing

**Table 4 (online only). Pharmacologic Therapies Administered Prior to Intubation by Site**

|                                          | Site 1<br>N=13 | Site 2<br>N=68 | Site 3<br>N=33 | Site 4<br>N=65 | Site 5<br>N=15 | Site 6<br>N=21 | Site 7<br>N=6 | Site 8<br>N=40 | All<br>N=261 |
|------------------------------------------|----------------|----------------|----------------|----------------|----------------|----------------|---------------|----------------|--------------|
|                                          | <i>n (%)</i>   | <i>n (%)</i>  | <i>n (%)</i>   | <i>n (%)</i> |
| Albuterol                                |                |                |                |                |                |                |               |                |              |
| Inhaled, intermittent                    | 8 (62)         | 59 (87)        | 23 (70)        | 48 (74)        | 10 (67)        | 15 (71)        | 3 (50)        | 31 (78)        | 197 (75)     |
| Inhaled, continuous                      | 7 (54)         | 24 (35)        | 18 (55)        | 27 (42)        | 7 (47)         | 10 (48)        | 4 (67)        | 21 (53)        | 118 (45)     |
| Corticosteroids, IV <sup>a</sup> or oral | 9 (69)         | 50 (74)        | 22 (67)        | 42 (65)        | 11 (73)        | 13 (62)        | 4 (67)        | 29 (73)        | 180 (69)     |
| Ipratropium, Inhaled                     | 5 (38)         | 37 (54)        | 13 (39)        | 13 (20)        | 8 (53)         | 7 (33)         | 3 (50)        | 7 (18)         | 93 (36)      |
| Terbutaline                              |                |                |                |                |                |                |               |                |              |
| IV                                       | 3 (23)         | 5 (7)          | 16 (48)        | 19 (29)        | 1 (7)          | 6 (29)         | 2 (33)        | 3 (8)          | 55 (21)      |
| SC <sup>b</sup> or IM <sup>c</sup>       | 1 (8)          | 4 (6)          | 1 (3)          | 4 (6)          | 1 (7)          | 1 (5)          | 0             | 2 (5)          | 14 (5)       |
| Inhaled                                  | 1 (8)          | 0              | 0              | 0              | 0              | 0              | 0             | 0              | 1 (0.4)      |
| Isoproterenol, IV                        | 1 (8)          | 0              | 0              | 1 (2)          | 0              | 0              | 0             | 0              | 2 (1)        |
| Epinephrine                              |                |                |                |                |                |                |               |                |              |
| IV                                       | 0              | 6 (9)          | 4 (12)         | 2 (3)          | 0              | 0              | 1 (17)        | 4 (10)         | 17 (7)       |
| SC or IM                                 | 1 (8)          | 37 (54)        | 12 (36)        | 35 (54)        | 6 (40)         | 3 (14)         | 0             | 9 (23)         | 103 (39)     |
| Inhaled                                  | 1 (8)          | 0              | 4 (12)         | 9 (14)         | 2 (13)         | 0              | 0             | 5 (13)         | 21 (8)       |
| Atropine, IV                             | 1 (8)          | 7 (10)         | 4 (12)         | 11 (17)        | 0              | 2 (10)         | 0             | 3 (8)          | 28 (11)      |
| Aminophylline/Theophylline IV or oral    | 1 (8)          | 1 (1)          | 0              | 1 (2)          | 2 (13)         | 1 (5)          | 1 (17)        | 4 (10)         | 11 (4)       |
| Helium-Oxygen, Inhaled                   | 0              | 4 (6)          | 2 (6)          | 14 (22)        | 3 (20)         | 1 (5)          | 0             | 8 (20)         | 32 (12)      |
| Magnesium sulfate, IV                    | 4 (31)         | 30 (44)        | 18 (55)        | 34 (52)        | 5 (33)         | 9 (43)         | 2 (33)        | 16 (40)        | 118 (45)     |
| Ketamine, IV                             | 1 (8)          | 0              | 5 (15)         | 3 (5)          | 1 (7)          | 3 (14)         | 3 (50)        | 2 (5)          | 18 (7)       |

<sup>a</sup> IV is intravenous; <sup>b</sup> SC is subcutaneous; <sup>c</sup> IM is intramuscular

**Table 6 (online only). Pharmacologic Therapies Administered After Extubation by Site**

|                                          | Site 1<br>N=13 | Site 2<br>N=66 | Site 3<br>N=32 | Site 4<br>N=62 | Site 5<br>N=15 | Site 6<br>N=17 | Site 7<br>N=6 | Site 8<br>N=40 | All<br>N=251 |
|------------------------------------------|----------------|----------------|----------------|----------------|----------------|----------------|---------------|----------------|--------------|
|                                          | <i>n (%)</i>   | <i>n (%)</i>  | <i>n (%)</i>   | <i>n (%)</i> |
| Albuterol                                |                |                |                |                |                |                |               |                |              |
| Inhaled, intermittent                    | 12 (92)        | 63 (95)        | 29 (91)        | 61 (98)        | 15 (100)       | 15 (88)        | 6 (100)       | 38 (95)        | 239 (95)     |
| Inhaled, continuous                      | 3 (23)         | 34 (52)        | 9 (28)         | 19 (31)        | 4 (27)         | 4 (24)         | 3 (50)        | 23 (58)        | 99 (39)      |
| Corticosteroids, IV <sup>a</sup> or oral | 8 (62)         | 61 (92)        | 32 (100)       | 52 (84)        | 10 (67)        | 16 (94)        | 5 (83)        | 37 (93)        | 221 (88)     |
| Ipratropium, Inhaled                     | 7 (54)         | 42 (64)        | 15 (47)        | 5 (8)          | 6 (40)         | 15 (88)        | 4 (67)        | 17 (43)        | 111 (44)     |
| Terbutaline                              |                |                |                |                |                |                |               |                |              |
| IV                                       | 3 (23)         | 4 (6)          | 10 (31)        | 8 (13)         | 0              | 4 (24)         | 1 (17)        | 1 (3)          | 31 (12)      |
| SC <sup>b</sup> or IM <sup>c</sup>       | 0              | 0              | 0              | 1 (2)          | 0              | 1 (6)          | 0             | 0              | 2 (1)        |
| Inhaled                                  | 0              | 0              | 0              | 0              | 0              | 0              | 0             | 0              | 0            |
| Isoproterenol, IV                        | 1 (8)          | 0              | 0              | 0              | 0              | 0              | 0             | 0              | 1 (0.4)      |
| Epinephrine                              |                |                |                |                |                |                |               |                |              |
| IV                                       | 0              | 0              | 2 (6)          | 1 (2)          | 0              | 0              | 0             | 1 (3)          | 4 (2)        |
| SC or IM                                 | 0              | 2 (3)          | 0              | 3 (5)          | 0              | 0              | 0             | 0              | 5 (2)        |
| Inhaled                                  | 1 (8)          | 2 (3)          | 6 (19)         | 6 (10)         | 6 (40)         | 0              | 0             | 1 (3)          | 22 (9)       |
| Atropine, IV                             | 0              | 0              | 0              | 0              | 0              | 0              | 0             | 0              | 0            |
| Aminophylline/Theophylline IV or oral    | 4 (31)         | 3 (5)          | 0              | 0              | 1 (7)          | 1 (6)          | 2 (33)        | 2 (5)          | 13 (5)       |
| Helium-Oxygen, Inhaled                   | 0              | 12 (18)        | 0              | 15 (24)        | 4 (27)         | 0              | 0             | 20 (50)        | 51 (20)      |
| Magnesium sulfate, IV                    | 0              | 5 (8)          | 3 (9)          | 4 (6)          | 0              | 0              | 0             | 3 (8)          | 15 (6)       |
| Ketamine, IV                             | 1 (8)          | 0              | 2 (6)          | 4 (6)          | 0              | 1 (6)          | 0             | 1 (3)          | 9 (4)        |

<sup>a</sup> IV is intravenous; <sup>b</sup> SC is subcutaneous; <sup>c</sup> IM is intramuscular

**Figure 2 (online only). Overall Distribution of Length of Mechanical Ventilation in Survivors**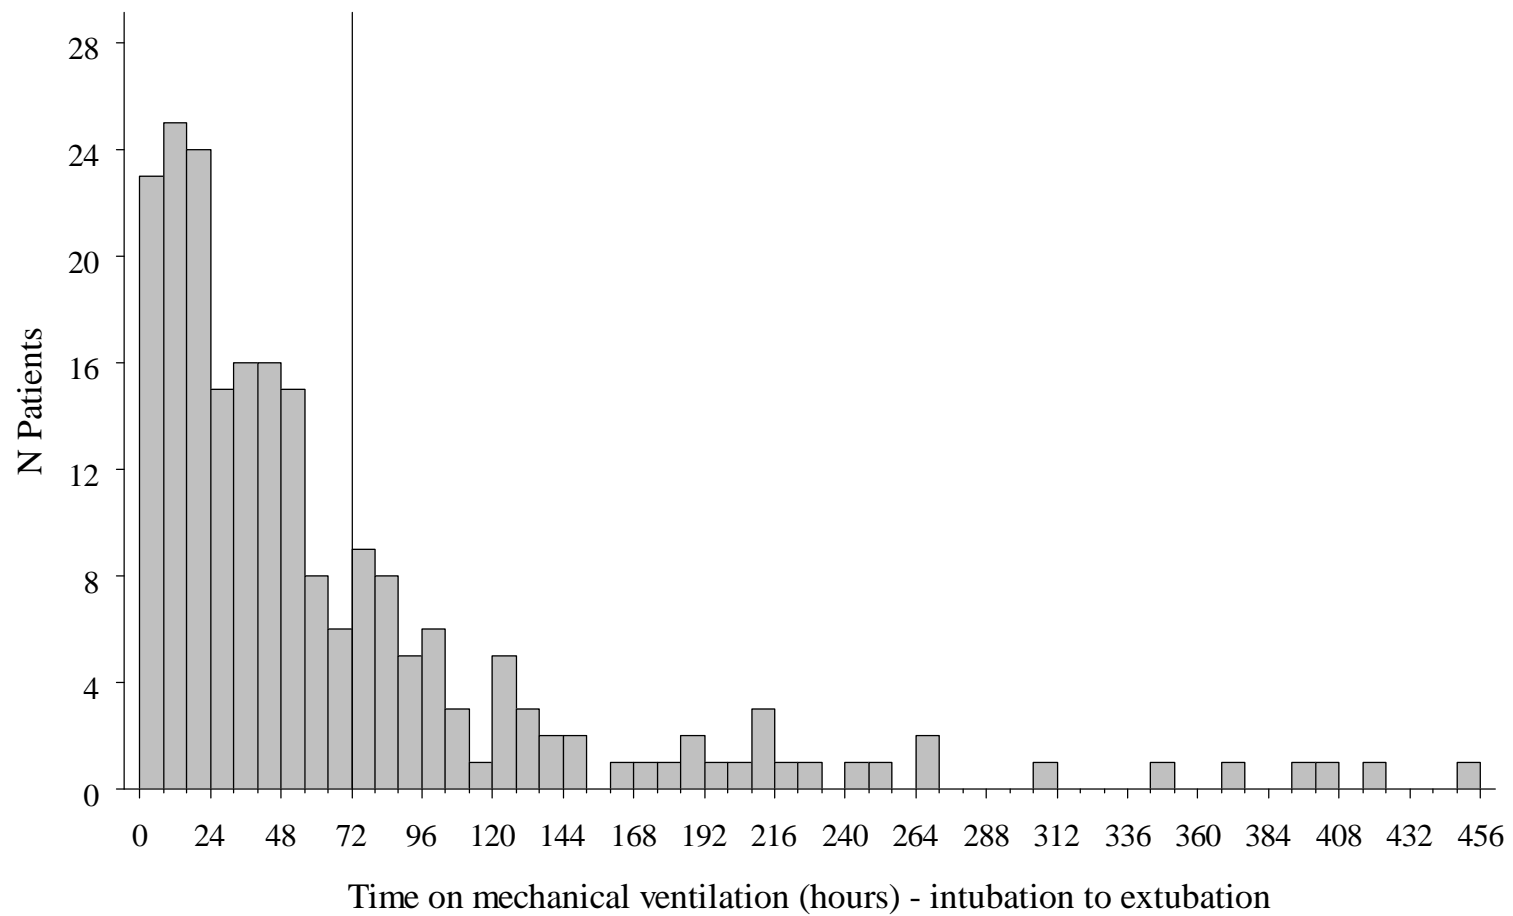

Supplement: NIHMS369832-supplement-01.pdf [file NIHMS369832-supplement-01.pdf]
